# Supplementary material for: Synthesis and Physical Property Characterisation of Spheroidal and Cuboidal Nuclear Waste Simulant Dispersions
Source: MDPI journal article supplement (doi:10.3390/ma11071235), 2018-07-18
Supplement: s1 [file s1]

Supplementary Materials:

# Synthesis and Physical Property Characterisation of Spheroidal and Cuboidal Nuclear Waste Simulant Dispersions

Jessica Shiels \*, David Harbottle and Timothy N. Hunter \*

School of Chemical and Process Engineering, University of Leeds, Leeds, LS2 9JT, UK; d.harbottle@leeds.ac.uk (D.H)

\*Correspondence: pmjas@leeds.ac.uk (J.S.); t.n.hunter@leeds.ac.uk (T.N.H.)

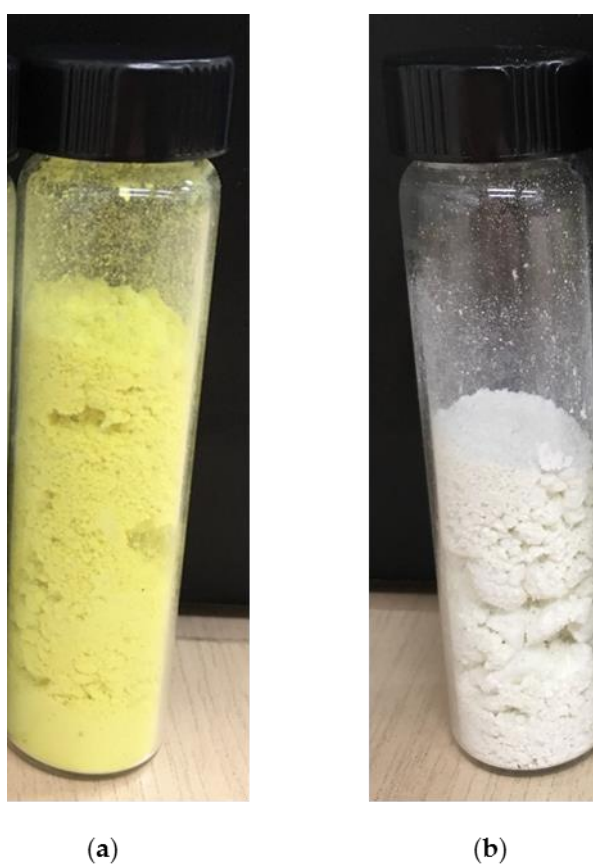

**Figure S1.** Images of (a) caesium phosphomolybdate (CPM) formed at 50 °C displaying a yellow coloured solid and (b) zirconium molybdate (ZM-a) displaying a white coloured solid.

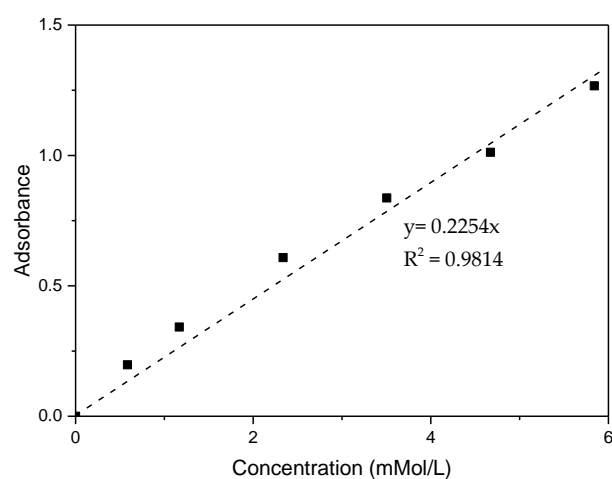

**Figure S2.** UV-Vis calibration curve for phosphomolybdic acid at various concentrations.

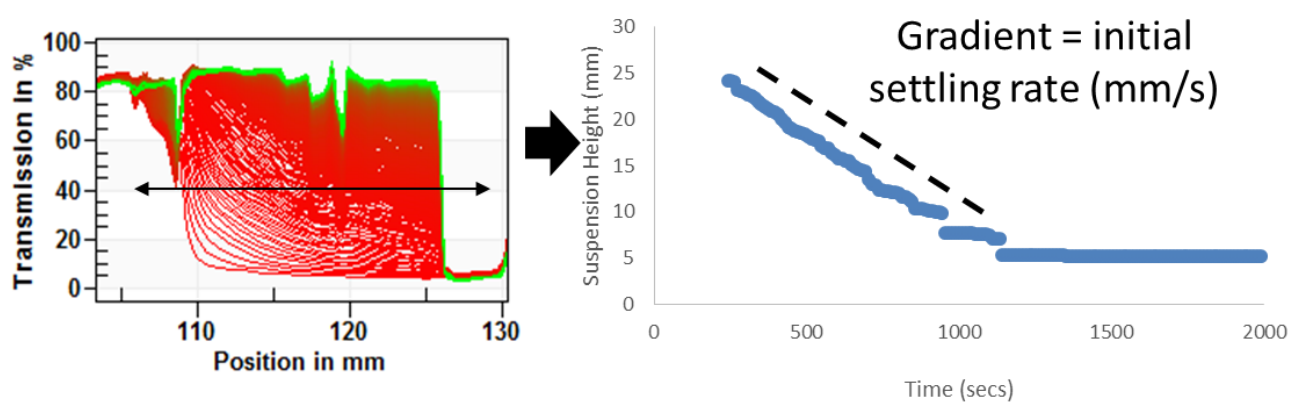

**Figure S3.** Raw LUMiSizer settling data showing transmission profile taken at 40 % converted to suspension height vs time graph for zirconium molybdate (ZM-a) at 4 vol % in water at 500 rpm.
